# Supplementary material for: The Effects of DDI1 on Inducing Differentiation in Ovine Preadipocytes via Oar-miR-432
Source: MDPI journal article supplement (doi:10.3390/ijms241411567), 2023-07-17
Supplement: s1 [file s1]

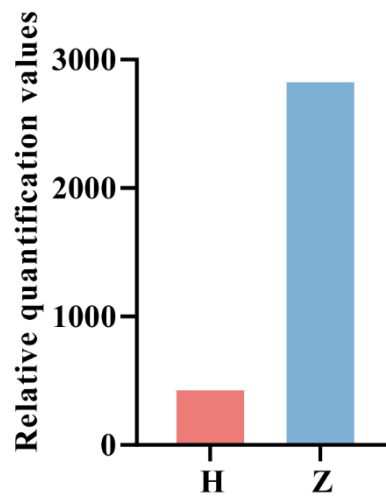

Figure S1: RNA-seq analysis of oar-miR-432 expression in the tail fat tissue of fat-tailed (H) and thin-tailed sheep (Z).

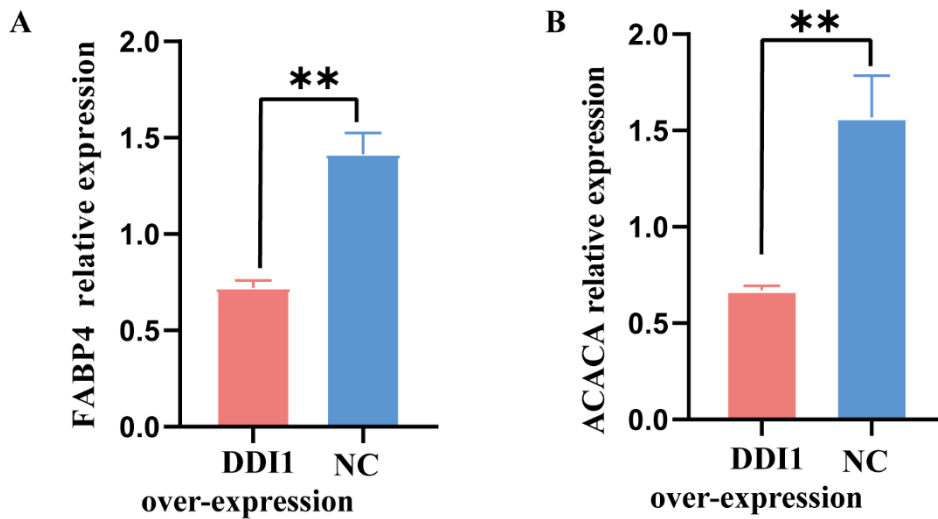

Figure S2: Relative expression of *FABP4* and *ACACA* when the *DDII* overexpression and their NC were transfected into preadipocytes. Data are presented as mean  $\pm$  SEM (n = 3). \*\* $P < 0.01$  and \* $P < 0.05$ .

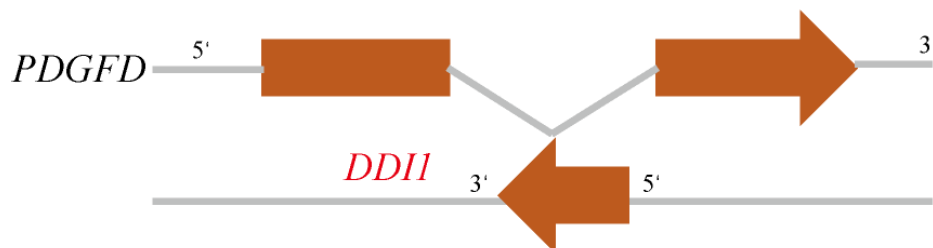

Figure S3: *DDII* gene sequence was completely located in the intron 1 of *PDGFD* gene. Because the overlapping region is limited to introns for *PDGFD*, there will be no overlapping the mRNAs.

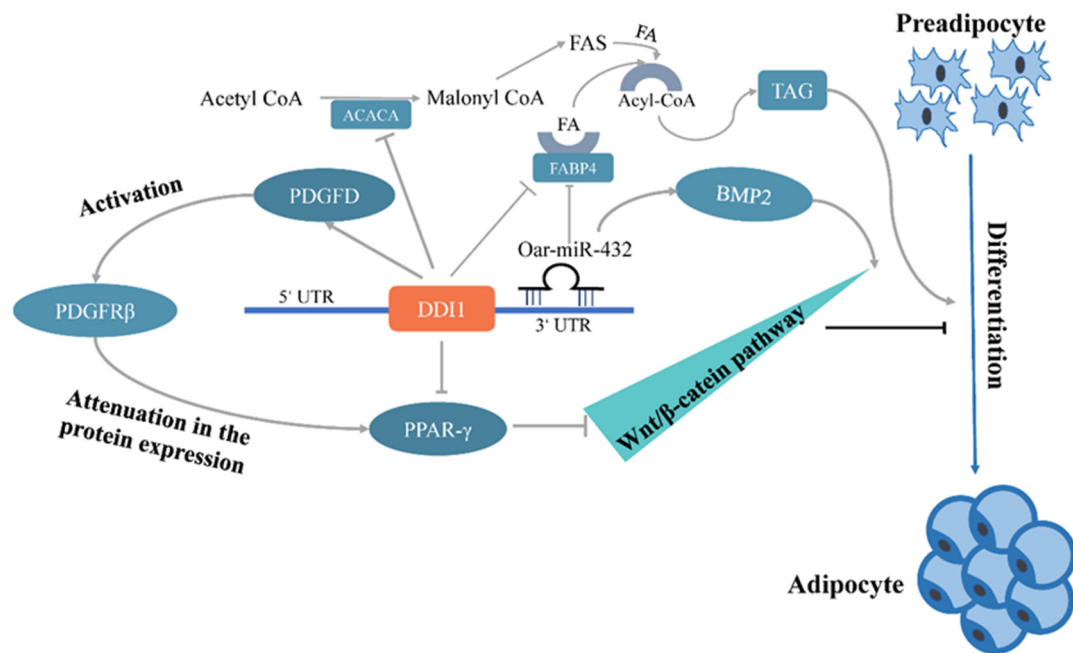

Figure S4: Schematic diagram illustrating how the mechanism of oar-miR-432 mediation by DDI1 modulates fat deposition development via the pathway.
